# Supplementary material
Source: publisher figshare collection journal article supplement (https://sage.figshare.com/ndownloader/files/22279452)

**Figure 1** **Supplement.** Average City Total Capital Outlay 1988-2012 (2012 Dollar)


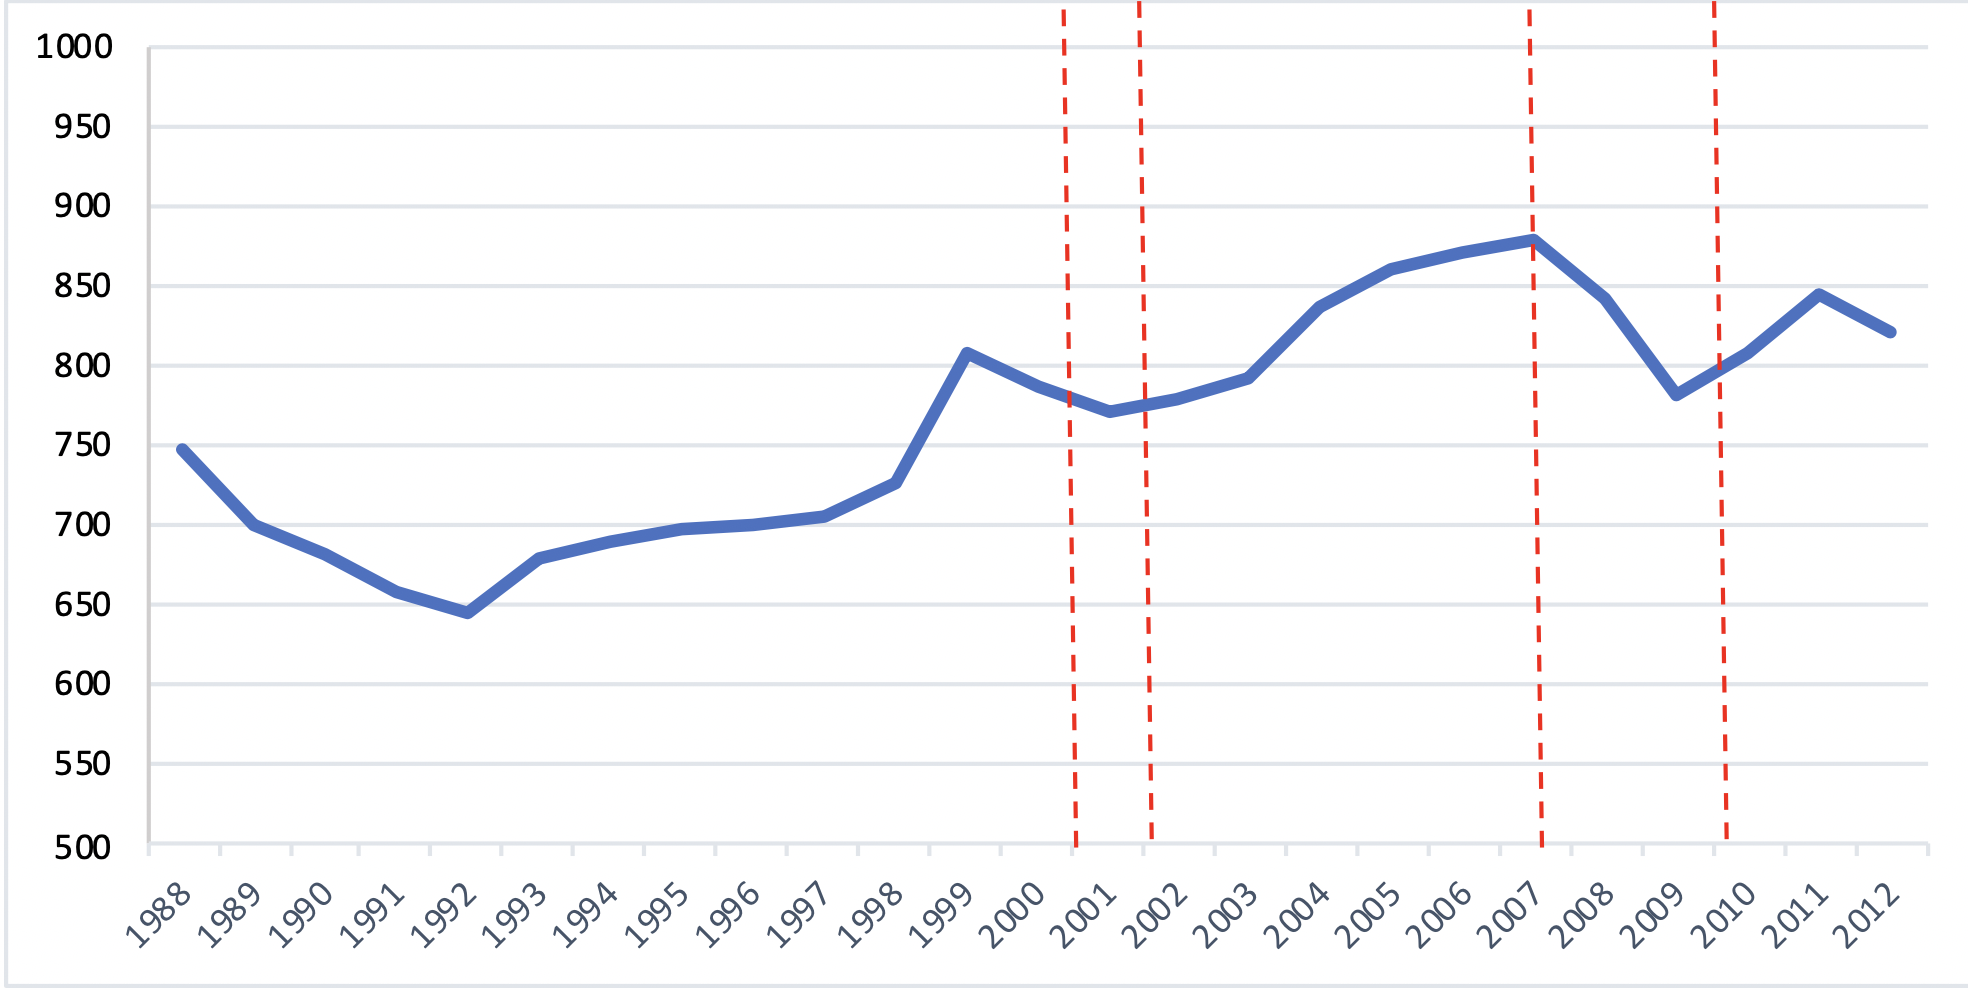


Data source: US Census Bureau

Supplement: Supplementary file 1 [file 22279452]
